# Supplementary material
Source: PubMed Central journal article supplement (PMC3835698)
Supplement: NIHMS526327-supplement-supplement_1.pdf [file NIHMS526327-supplement-supplement_1.pdf]

| <b>Table Supplement:</b> Highest loading factors contained in the factor analysis for the alpha fetoprotein and ultrasound algorithms. |                                                          |                                                                                                                                                                                                  |
|----------------------------------------------------------------------------------------------------------------------------------------|----------------------------------------------------------|--------------------------------------------------------------------------------------------------------------------------------------------------------------------------------------------------|
|                                                                                                                                        | <b>PRINCIPAL COMPONENT</b>                               | <b>VARIABLES WITH A FACTOR LOADING GREATER THAN 0.40</b>                                                                                                                                         |
| <b>Alpha fetoprotein (AFP)</b>                                                                                                         |                                                          |                                                                                                                                                                                                  |
|                                                                                                                                        | 1. Substance abuse                                       | Chronic alcoholism, alcohol dependency, drug dependency, cocaine use, non-dependent use of drugs                                                                                                 |
|                                                                                                                                        | 2. Prior liver function tests                            | Alkaline phosphatase test within 30-days prior to AFP, alkaline phosphatase test within 2-years prior to AFP, bilirubin test within 30-days before AFP, bilirubin test within 2-years before AFP |
|                                                                                                                                        | 3. CT scan after AFP                                     | CT scan within 90-days after AFP                                                                                                                                                                 |
|                                                                                                                                        | 4. CT scan before AFP                                    | CT scan within 90-days before AFP                                                                                                                                                                |
|                                                                                                                                        | 5. LDH, diabetes, HCC diagnosis                          | Total serum lactic dehydrogenase (LDH) test within 30-days before AFP, diabetes, diagnosis code for HCC 60-days following AFP                                                                    |
|                                                                                                                                        | 6. Non-specific hepatitis                                | Acute hepatitis, chronic hepatitis                                                                                                                                                               |
|                                                                                                                                        | 7. Liver disease severity                                | Prothrombin time tested within 30-days before AFP, esophageal varices without bleeding                                                                                                           |
|                                                                                                                                        | 8. Hepatitis                                             | Non-alcoholic hepatitis, HBV without coma                                                                                                                                                        |
|                                                                                                                                        | 9. Ultrasound                                            | Ultrasound within 90-days before or after AFP                                                                                                                                                    |
| <b>Ultrasound</b>                                                                                                                      |                                                          |                                                                                                                                                                                                  |
|                                                                                                                                        | 1. Substance abuse                                       | Chronic alcoholism, alcohol dependency, drug dependency                                                                                                                                          |
|                                                                                                                                        | 2. Liver function tests within 30 days before ultrasound | Alkaline phosphatase test within 30-days before ultrasound, bilirubin test within 30-days before ultrasound, LDH within 30-days before ultrasound                                                |
|                                                                                                                                        | 3. CT scan – 30 days                                     | CT scan within 30-days before ultrasound, CT scan within 30-days before or after ultrasound                                                                                                      |
|                                                                                                                                        | 4. Liver function tests within 2-years before ultrasound | Alkaline phosphate test within 2-years before ultrasound, total bilirubin test within 2-years before ultrasound, serum lactic dehydrogenase (LDH) test within 2-years before ultrasound          |
|                                                                                                                                        | 5. Hepatitis                                             | HCV, unspecified hepatitis                                                                                                                                                                       |
|                                                                                                                                        | 6. CT scan – 90 days, diabetes                           | CT scan within 90-days before ultrasound, diabetes                                                                                                                                               |
|                                                                                                                                        | 7. IV drug use, HBV                                      | Cocaine use, use of drugs, HBV                                                                                                                                                                   |
|                                                                                                                                        | 8. Liver biopsy, AFP                                     | Liver biopsy within 1-year before or after ultrasound, prothrombin time, AFP within 90-days before or after ultrasound                                                                           |
|                                                                                                                                        | 9. HCC diagnosis, esophageal varices                     | HCC diagnosis within 60 days after ultrasound, esophageal varices without bleeding                                                                                                               |
